# Supplementary material for: Qualitative study of the needs of injured children and their families after a child’s traumatic injury
Source: PubMed Central journal article supplement — BMJ Open. 2020 Nov 30;10(11):e036682. doi: 10.1136/bmjopen-2019-036682 (PMC7705499; doi:10.1136/bmjopen-2019-036682), 2020-11-30
Supplement: bmjopen-2019-036682supp001.pdf [file bmjopen-2019-036682supp001.pdf]

## APPENDIX 1

|                                 | <b>Guide to Questions</b>                                                                                                                                                                                                                                                                                                                                                                                                                                                                                                                                                                                                                                                                                                                                                           |
|---------------------------------|-------------------------------------------------------------------------------------------------------------------------------------------------------------------------------------------------------------------------------------------------------------------------------------------------------------------------------------------------------------------------------------------------------------------------------------------------------------------------------------------------------------------------------------------------------------------------------------------------------------------------------------------------------------------------------------------------------------------------------------------------------------------------------------|
| <b>Generic needs</b>            | <p>Tell me about what was different for <b>you/ you and your child</b> following your injury?</p> <p>What help did <b>you/your child</b> need after your injury?</p>                                                                                                                                                                                                                                                                                                                                                                                                                                                                                                                                                                                                                |
| <b>Discharge specific needs</b> | <p>What was it like for <b>you/ you and your child</b> when you went home from the hospital?</p> <p>When <b>you/your child</b> went home from the hospital how did you feel?</p> <p>Did you feel <b>you/you and your child</b> prepared to go home?</p> <p>Was there anything that worried <b>you/ you and your child</b> about going home?</p> <p>Did <b>you/you and your child</b> need any support/help from hospital staff/health professionals when you went home from the hospital?</p> <p>Did you feel that you got the help <b>you/you and your child</b> needed?</p> <p>Did <b>you/your child</b> have any difficulties when you went home from the hospital?</p> <p>Was there anything that really helped or made things easier when <b>you/your child</b> went home?</p> |

|                          |                                                                                                                                                                                                                                                                                                                                                                                                                                                                                                                                                                                                            |
|--------------------------|------------------------------------------------------------------------------------------------------------------------------------------------------------------------------------------------------------------------------------------------------------------------------------------------------------------------------------------------------------------------------------------------------------------------------------------------------------------------------------------------------------------------------------------------------------------------------------------------------------|
|                          | <p><b>Probes:</b> Equipment, modifications to home, home visits, advice leaflets, meetings before discharge, follow up appointments, phone calls from the hospital.</p>                                                                                                                                                                                                                                                                                                                                                                                                                                    |
| <b>Key Worker</b>        | <p>Did <b>you/your child</b> have a key worker (a health professional/nurse/physio/occupational-therapist/carer/doctor) who provided help or advice when you went home from the hospital?</p> <p><b>If answers yes:</b> Did you find this helpful? Why was this helpful?</p> <p>What did the key worker do for you?</p> <p><b>If answers no:</b> Do you think that a key worker would have been helpful?</p> <p>What help/support could have they provided?</p>                                                                                                                                            |
| <b>Information needs</b> | <p>Was <b>your/your child's</b> injury explained to you in the hospital?</p> <p>Did you understand the explanation of <b>your/your child's injury</b>?</p> <p>Did you understand how the injury would affect <b>you/your child</b>?</p> <p>Were you provided with advice about <b>what you/your child</b> was allowed and not allowed to do following <b>your/your child's injury</b>? Was this easy to understand?</p> <p>Did you receive any advice or information when you were discharged from the hospital? Probe: information booklet, helplines, follow up appointments/ follow up phone calls.</p> |

|                          |                                                                                                                                                                                                                                                                                                                                                                                                                                                                                                                                                               |
|--------------------------|---------------------------------------------------------------------------------------------------------------------------------------------------------------------------------------------------------------------------------------------------------------------------------------------------------------------------------------------------------------------------------------------------------------------------------------------------------------------------------------------------------------------------------------------------------------|
|                          | <p><b>If answers yes:</b> Was the information helpful/how? Were you given enough information? Was it easy to understand? Who gave you the information?</p> <p><b>If answers no:</b> Was there you wanted to know when you went home from the hospital, which you were not told? Was there anything you had to find out for yourself?</p>                                                                                                                                                                                                                      |
| <b>Educational needs</b> | <p>How did <b>you/your child</b> deal with returning to school after their injury?</p> <p>Did <b>you/your child</b> have any difficulties returning to school?</p> <p>Did <b>your/your child's teachers</b> know that you/your child had suffered from an injury?</p> <p><b>Probes:</b> Did they understand the injury/do anything differently?</p> <p>Was there anything that really helped <b>you/your child</b> when you returned to school?</p> <p>Were there any changes made or advice which made <b>your/your child's</b> return to school easier?</p> |
| <b>Social needs</b>      | <p>Did <b>your</b> friends/family know about <b>your/your child's</b> injury?</p> <p>Do you think they understood what had happened to <b>you/your child</b>?</p> <p>Were <b>your friendships</b> different in any way following <b>your/your child's</b> injury?</p> <p>Did your friends and family help <b>you/your child after your child's injury</b>?</p> <p>Did <b>your/your child's</b> hobbies/play/sporting activities change following your injury?</p>                                                                                             |

|                               |                                                                                                                                                                                                                                                                                                                                                                                                                                                                                                                                                                                                                                                                                                                                                                                                                                                                                                                                                                                |
|-------------------------------|--------------------------------------------------------------------------------------------------------------------------------------------------------------------------------------------------------------------------------------------------------------------------------------------------------------------------------------------------------------------------------------------------------------------------------------------------------------------------------------------------------------------------------------------------------------------------------------------------------------------------------------------------------------------------------------------------------------------------------------------------------------------------------------------------------------------------------------------------------------------------------------------------------------------------------------------------------------------------------|
| <p><b>Physical</b></p>        | <p>Did <b>you/your child</b> have any physical problems following the injury?</p> <p>(Probes: will depend on the age of child: difficulties walking, talking, crawling, eating, speaking hearing, toileting, returning to their usual activities)</p> <p>Did <b>you/your child</b> need crutches/walking frame/wheel chair after your injury?</p> <p>Did <b>you/your child</b> have any treatment from therapists /health professionals to help with the physical problems after the injury?</p> <p>Therapists and Health Professionals are: physiotherapists/occupational therapists/dieticians/speech therapists/nurses/doctors.</p> <p>Did you need additional care/help at home? Probe: adaptations to the home, downstairs living.</p> <p>Was there any change to <b>your/your child's</b> appearance after their injury?</p> <p><b>Probes:</b> scars, cuts &amp; bruises, weight gain or loss, items your child had to wear: supports, casts, brace, breathing pipe.</p> |
| <p><b>Psychological</b></p>   | <p>Were <b>you or your child</b> scared or worried after <b>your/your child's injury?</b></p> <p>Did <b>you or your child</b> have any problems sleeping following their injury?</p> <p>Did <b>your child's/your behaviour</b> change following the injury?</p>                                                                                                                                                                                                                                                                                                                                                                                                                                                                                                                                                                                                                                                                                                                |
| <p><b>Emotional needs</b></p> | <p>How did you feel after <b>your/your child's injury?</b></p>                                                                                                                                                                                                                                                                                                                                                                                                                                                                                                                                                                                                                                                                                                                                                                                                                                                                                                                 |

|                              |                                                                                                                                                                                                                                                                                                                                                                                                                                                                                                                                                                                                                                                     |
|------------------------------|-----------------------------------------------------------------------------------------------------------------------------------------------------------------------------------------------------------------------------------------------------------------------------------------------------------------------------------------------------------------------------------------------------------------------------------------------------------------------------------------------------------------------------------------------------------------------------------------------------------------------------------------------------|
|                              | <p>Did <b>your/your child's</b> injury affect you emotionally?</p> <p>Did you receive any emotional support from staff at the hospital or people in your local community?</p> <p><b>Probes:</b> worried, concerns for the future, upset, scared.</p>                                                                                                                                                                                                                                                                                                                                                                                                |
| <b>Family/work needs?</b>    | <p>Did <b>your/your child's</b> injury affect the family or family life?</p> <p><b>Probes:</b></p> <ul style="list-style-type: none"> <li>• Was there any change to the daily routine?</li> <li>• Was there any change to roles/responsibilities within the family?</li> <li>• Do you have other children? Was it difficult to look after them at the time of your child's injury?</li> <li>• Were you working at the time of your child's injury? Did their injury affect work in any way?</li> <li>• Was your place of employment supportive after your child's injury?</li> <li>• Did you need any support to look after your child ?</li> </ul> |
| <b>Current situation</b>     | <p>What are things like for <b>you/your child now?</b></p> <p>Are you receiving help from either the hospital or your community services?</p> <p>Have you/ your child regained their previous level of activities at home?</p> <p>And at school?</p>                                                                                                                                                                                                                                                                                                                                                                                                |
| <b>Unmet needs/met needs</b> | <p>Looking back over the time since the injury, is there anything that could have been done differently to help <b>your/your child's</b> recovery?</p> <p>With hindsight were there any services which you did not receive which you think would have helped you and your child/you?</p> <p>What really helped you after your injury/ you and your child after your child's injury. Probes: Advice/information/people (health</p>                                                                                                                                                                                                                   |

|                |                                                                                                                                                     |
|----------------|-----------------------------------------------------------------------------------------------------------------------------------------------------|
|                | professionals/family, friends/people in the community), equipment, support groups, follow ups.                                                      |
| <b>Closing</b> | Thank you for much for talking to me today. Do you have any questions or is there anything else you would like to tell me which we haven't covered? |
